# Supplementary material for: Heteroatomic stitching of broken WS2 monolayer with enhanced surface potential
Source: Royal Society of Chemistry journal article supplement (doi:10.1039/d2nr06288g), 2023-01-01
Supplement: d2nr06288g1.pdf [file d2nr06288g1.pdf]

## **Heteroatomic Stitching of Broken WS<sub>2</sub> Monolayer with Enhanced Surface Potential**

**Deepa Thakur<sup>1</sup>, Yukio Sato<sup>2</sup>, Viswanath Balakrishnan<sup>1\*</sup>**

<sup>1</sup>School of Mechanical and Materials Engineering, Indian Institute of Technology Mandi, Kamand, Himachal Pradesh, India-175075

<sup>2</sup>Department of Materials Science and Engineering, Kyushu University, 744 Motooka, Nishiku, Fukuoka, Japan (819-0395)

Email: viswa@iitmandi.ac.in

### **Supplementary Information:**

**Figure S1: (a) Illustration of CVD growth of MoS<sub>2</sub> by sulphurising MoO<sub>3</sub> powder. (b) Image of stitched sample grown over SiO<sub>2</sub>/Si wafer.**

**Figure S2: (a) High magnified FESEM images to show (a) crack and (b) stitched crack in WS<sub>2</sub>.**

**Figure S3: (a) active edge length comparison (a) in crack free WS<sub>2</sub> monolayer and (b) cracked WS<sub>2</sub>.**

**Figure S4: STEM-HAADF image of stitched region along with elemental mapping: (a) HAADF image of the selected area is shown. (b) W, (c) Mo and (d) S mapping is shown.**

**Figure S5: (a) STEM-HAADF image of WS<sub>2</sub>-stitch interface as displayed in Fig. 4(b). (b)-(d) Magnified images in the region shown by orange, blue, and green boxes in (a). (e)-(g) Magnified images with overlay of bright contrast showing cation positions. Orange and green open circles denote W and Mo positions, respectively.**

**Figure S6: (a) AFM height scan and (b) height plot of multilayer MoS<sub>2</sub>. (c) KPFM scan and (d) KPFM plot of multilayer MoS<sub>2</sub>.**

**Figure S7: (a) AFM height scan and (b) height plot of multilayer WS<sub>2</sub>. (c) KPFM scan and (d) KPFM plot of multilayer WS<sub>2</sub>.**

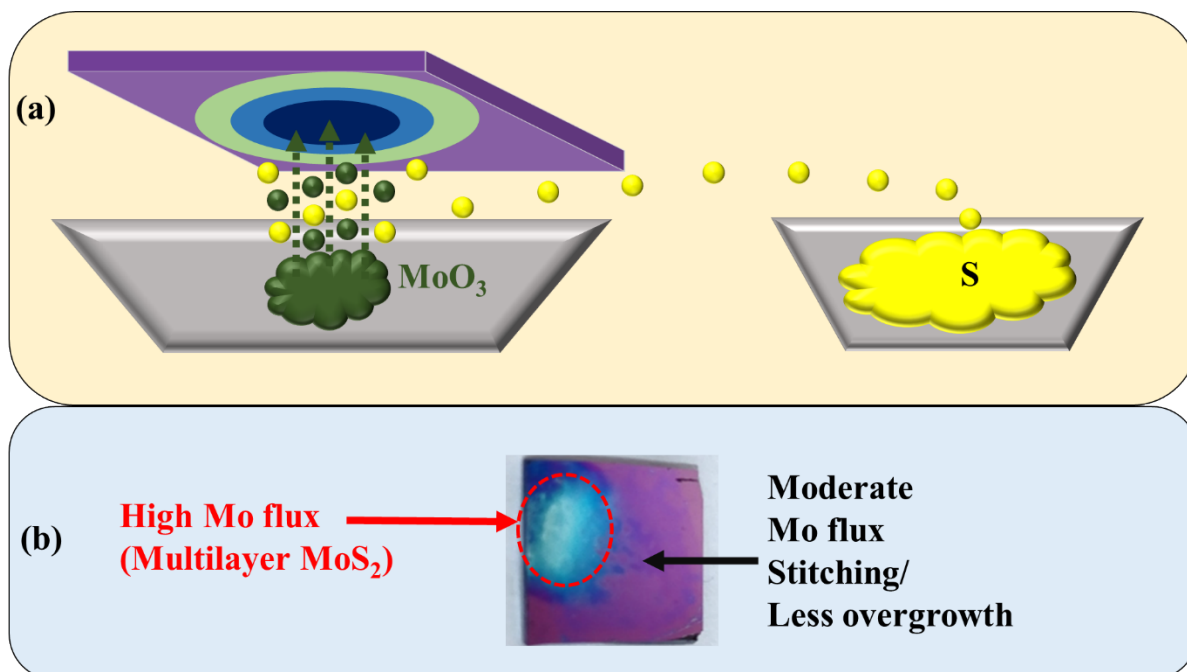

**Figure S1: (a) Illustration of CVD growth of MoS<sub>2</sub> by sulphurising MoO<sub>3</sub> powder. (b) Image of stitched sample grown over SiO<sub>2</sub>/Si wafer.**

CVD growth method was used to grow stitched WS<sub>2</sub>. Firstly, cracked WS<sub>2</sub> was grown over SiO<sub>2</sub>/Si substrate followed by MoS<sub>2</sub> growth. Here MoS<sub>2</sub> growth was achieved by sulphurising MoO<sub>3</sub> in Ar environment (figure S1a). Here MoO<sub>3</sub> was taken in powder form. During formation of MoS<sub>2</sub>, those areas on the substrate which were near MoO<sub>3</sub> powder get more precursor flux. Closer areas were observed to grow bulk like and Multilayer MoS<sub>2</sub>. Here vertical growth of MoS<sub>2</sub>-WS<sub>2</sub> heterostructure was observed to dominate. On moving away from high flux region to moderate flux region, MoS<sub>2</sub> layer number was observed to decrease and stitched regions were found. In figure S1b, image of a sample wafer is shown. The area marked with red circle have high precursor flux and due to which multilayer MoS<sub>2</sub> growth dominate this region. The areas outside this red circle have moderate flux and corresponds to the region where stitched WS<sub>2</sub> were grown.

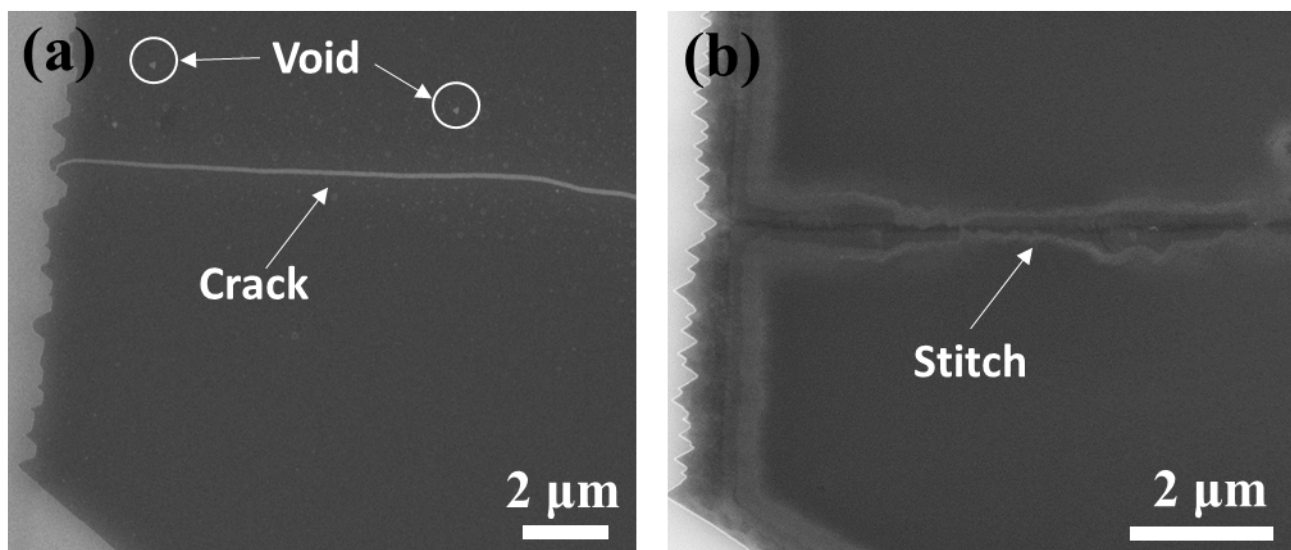

**Figure S2: (a) High magnified FESEM images to show (a) crack and (b) stitched crack in  $\text{WS}_2$ .**

The first figure S2a shows the  $\text{WS}_2$  prior to the growth of  $\text{MoS}_2$ . Initially  $\text{WS}_2$  is cracked and have small voids as well. Voids are marked inside white circles. The crack is grey colored line discontinuing the  $\text{WS}_2$  into two fragments. This crack is filled after the growth of  $\text{MoS}_2$ . The growth of  $\text{MoS}_2$  is also observed in the outer edges of  $\text{WS}_2$  flake as well. After the  $\text{MoS}_2$  growth, both the fragmented parts of  $\text{WS}_2$  are joined as shown in S2b.

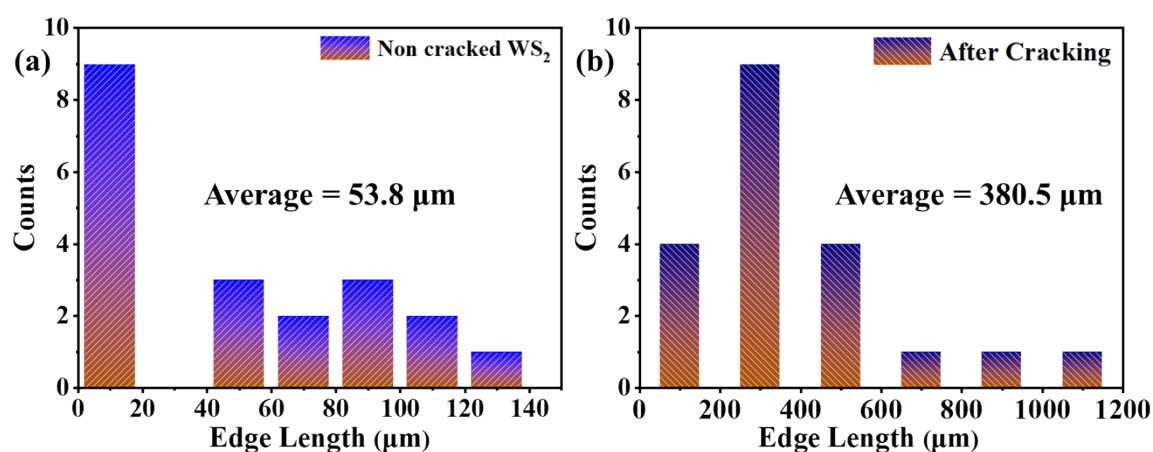

**Figure S3: (a) active edge length comparison (a) in crack free  $\text{WS}_2$  monolayer and (b) cracked  $\text{WS}_2$ .**

Edges have unsatisfied dangling bonds which act as active site for many applications like catalysis, electrochemistry, adsorption etc. It was observed that smaller domains are free from cracks and voids. The average edge length in crack free  $\text{WS}_2$  was  $53.8 \mu\text{m}$  as calculated in

figure S3a. Whereas active edge length was observed to increase in after formation of cracks in  $\text{WS}_2$ . The average edge length in fractured  $\text{WS}_2$  was calculated to be  $380.5 \mu\text{m}$  as shown in figure S3b. Cracking in  $\text{WS}_2$  have ability to increase the active edges by  $\sim 7\text{X}$ , as evaluated from edge length histograms.

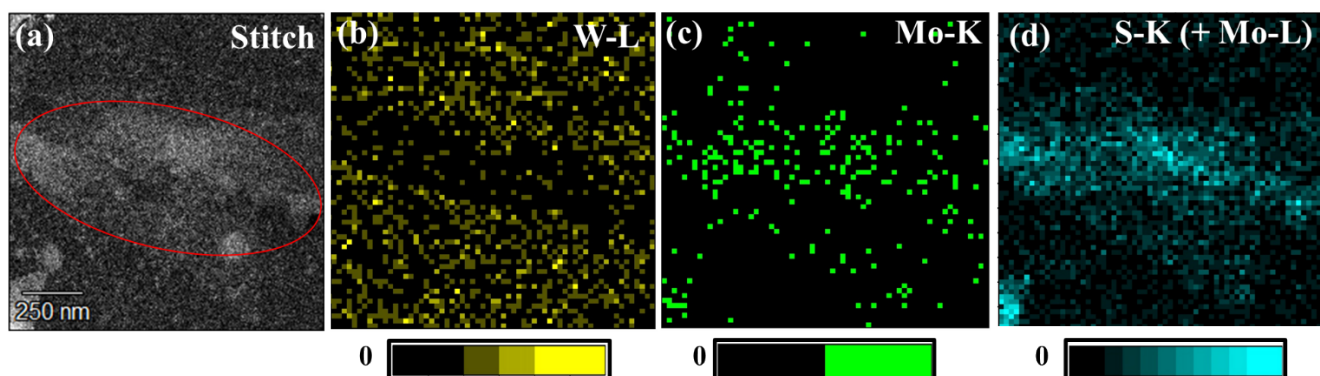

**Figure S4: STEM-HAADF image of stitched region along with elemental mapping: (a) HAADF image of the selected area is shown. (b) W-L, (c) Mo-K and (d) S-K (+ Mo-L) mapping is shown.**

The red oval region shown in S4a is the  $\text{MoS}_2$ -Stitch. In the W-L mapping shown in figure S4b, middle region is W deficient and on the other sides W is present. Figure S4c shows the Mo-K map. The Mo signal is present only in the middle region near to W deficient area. Figure S4d presents the S-K (+ Mo-L) map. Because X-ray energy for the S-K line ( $\sim 2.307 \text{ keV}$ ) was close to that for the Mo-L line ( $\sim 2.293 \text{ keV}$ ), the S-K map should also include the Mo-L signal. The signal of S is present everywhere which is due to presence of S in  $\text{WS}_2$  as well as in  $\text{MoS}_2$ . More intense signal in the middle can be due to the presence of multilayer  $\text{MoS}_2$  as well as detection of the Mo-L signal.



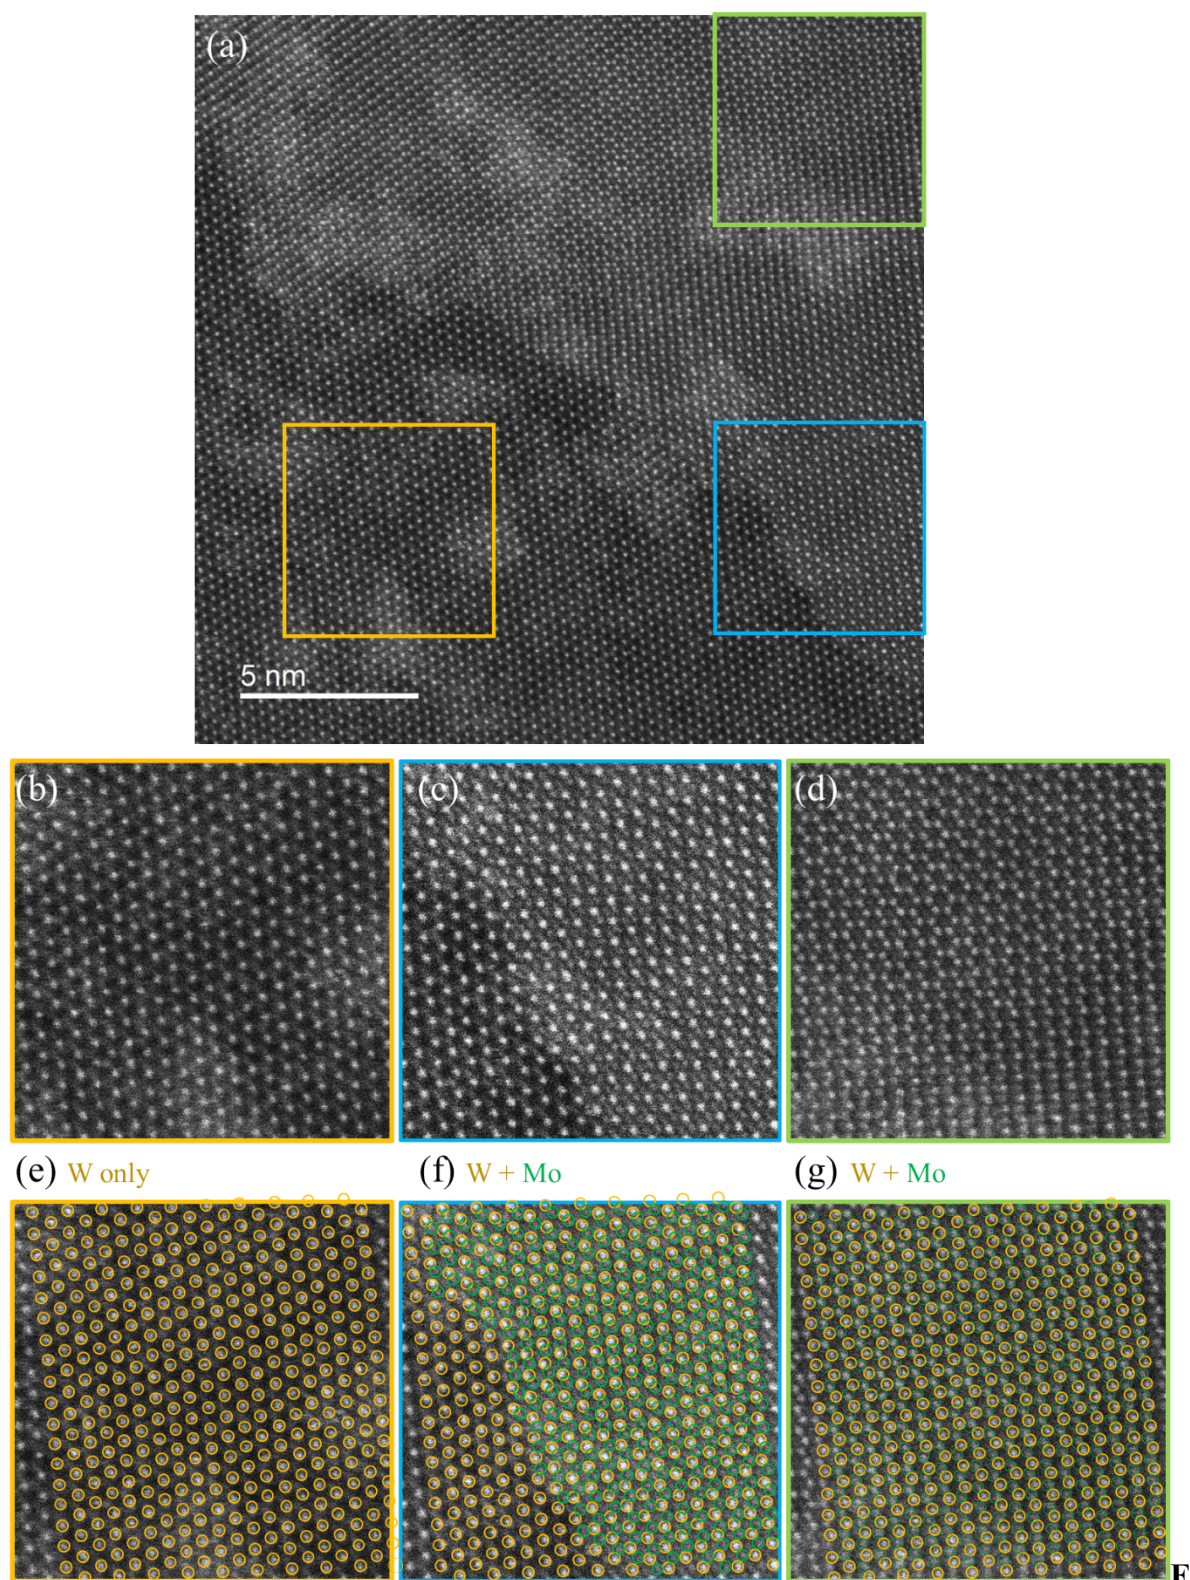

**Figure S5: (a) STEM-HAADF image of WS<sub>2</sub>-stitch interface as displayed in Fig. 4(b). (b)-(d) Magnified images in the region shown by orange, blue, and green boxes in (a). (e)-(g) Magnified images with overlay of bright contrast showing cation positions. Orange and green open circles denote W and Mo positions, respectively.**

Figure S5(a) shows the interface between the WS<sub>2</sub> and stitch. Note that bright contrast indicates position of heavy element such as W and Mo, because contrast of STEM-HAADF image is

dependent on atomic number of constituting ions. In the left-bottom region (Fig. S5(b)), only  $\text{WS}_2$  layer was observed, in which W positions were observed as hexagonal lattice. In the right-bottom side (Fig. S5(c)), additional contrast due to presence of Mo overlapped in addition to the contrast for W, which was due to the overgrowth of  $\text{MoS}_2$ . Furthermore, the overlapping pattern looked different in the top-right region (Fig. S5(d)). This was due to the lattice mismatch between the  $\text{WS}_2$  and  $\text{MoS}_2$  layers. The difference was quite small, shift of the  $\text{MoS}_2$  lattice occurred a little by a little. Therefore, the shift could not be recognized without investigating a wide region. These points were highlighted in Fig. S5(e)-(g) by overlaying W and Mo positions by open circles. From the comparison between Fig. S5(f) and (g), it was clarified that  $\text{MoS}_2$  lattice was slightly shifted due to small lattice mismatch between the  $\text{WS}_2$  and  $\text{MoS}_2$  layers.

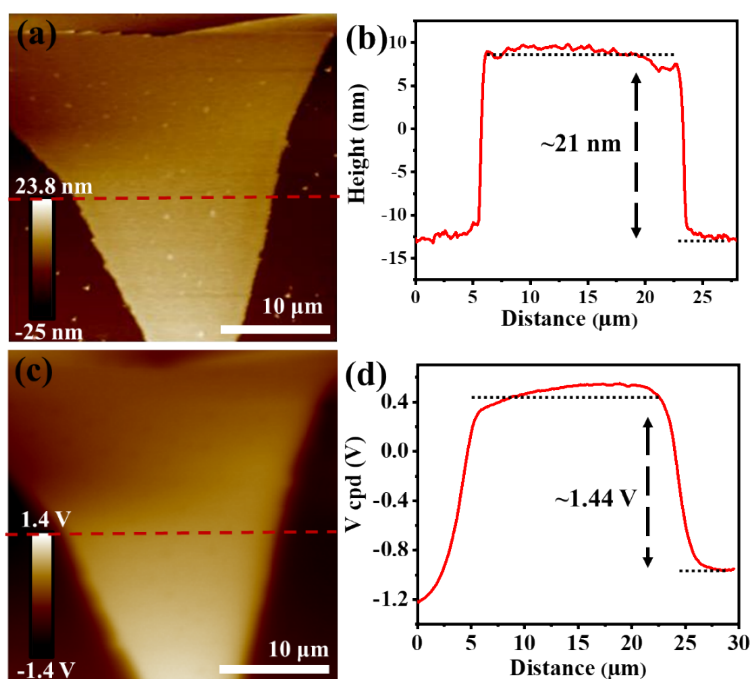

**Figure S6: (a) AFM height scan and (b) height plot of multilayer  $\text{MoS}_2$ . (c) KPFM scan and (d) KPFM plot of multilayer  $\text{MoS}_2$ .**

In the present work, multilayer  $\text{MoS}_2$  stitches the fractured  $\text{WS}_2$ . In order to illustrate the work function of pristine  $\text{MoS}_2$  before the heterostructure formation, AFM and KPFM measurement were done. AFM height scan is shown in figure S6a. The line scan taken from this flake is plotted in S6b. The height difference from substrate indicates towards the  $\sim 21$  nm thickness. The KPFM image of same flake is presented in figure S6c. The quantitative analysis shown in figure S6d indicates  $\sim 1.44$  V potential difference between  $\text{MoS}_2$  and substrate.

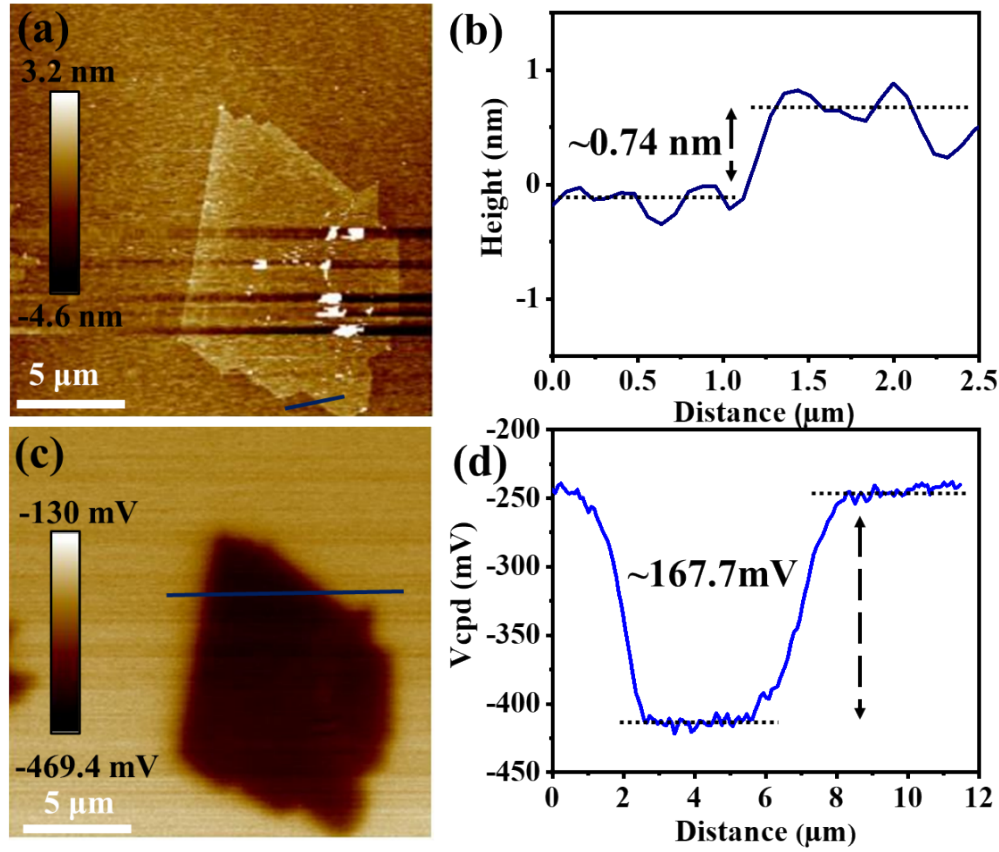

**Figure S7: (a) AFM Height scan and (b) height plot of multilayer WS<sub>2</sub>. (c) KPFM scan and (d) KPFM plot of multilayer WS<sub>2</sub>.**

In order to probe the work function of pristine WS<sub>2</sub> before the heterostructure formation, AFM and KPFM measurements were performed. AFM height scan is shown in figure S7a. The height line profile taken from this flake is plotted in S7b. The height difference from substrate is found to be around ~ 0.74 nm in thickness. This indicates single layer nature of WS<sub>2</sub>. The KPFM image of same flake is presented in figure S7c. The quantitative analysis shown in figure S6d indicates ~167.7mV potential difference between substrate and MoS<sub>2</sub>.

The calculated difference in fermi levels between individual MoS<sub>2</sub> and WS<sub>2</sub> is shown below.

From the literature<sup>1,2</sup> it is known that

$$e.V_{cpd} = \phi_{tip} - \phi_{material} \dots \dots \dots (S1)$$

Where V<sub>cpd</sub> represents contact potential difference and  $\phi$  represents work function. Now using same equation for Substrate SiO<sub>2</sub>/Si, MoS<sub>2</sub> and WS<sub>2</sub> we get,

$$e. V_{cpd\ WS_2} = \phi_{tip} - \phi_{WS_2} \dots\dots\dots (S2)$$

$$e. V_{cpd\ MoS_2} = \phi_{tip} - \phi_{MoS_2} \dots\dots\dots (S3)$$

$$e. V_{cpd\ SiO_2} = \phi_{tip} - \phi_{SiO_2} \dots\dots\dots (S4)$$

As the measurements of WS<sub>2</sub> and MoS<sub>2</sub> are performed on SiO<sub>2</sub>/Si substrate individual material needs to be corrected with respect to substrate. Subtracting equation (S2) from equation (S4) and equation (S3) from equation (S4) we get

$$e. \Delta V_{cpd1} = V_{cpd\ SiO_2} - V_{cpd\ WS_2} = \phi_{WS_2} - \phi_{SiO_2} \dots\dots\dots (S5)$$

$$e. \Delta V_{cpd2} = V_{cpd\ SiO_2} - V_{cpd\ MoS_2} = \phi_{MoS_2} - \phi_{SiO_2} \dots\dots\dots (S6)$$

Now, subtracting equation (S6) from equation (S5), we get

$$e. \Delta V_{cpd1} - e. \Delta V_{cpd2} = V_{cpd\ MoS_2} - V_{cpd\ WS_2} = \phi_{WS_2} - \phi_{MoS_2} \dots\dots\dots (S7)$$

Taking values from figure S4 and S5, we have

$$\Delta V_{cpd1} = V_{cpd\ SiO_2} - V_{cpd\ WS_2} = 0.1677\ V$$

$$\Delta V_{cpd2} = V_{cpd\ SiO_2} - V_{cpd\ MoS_2} = -1.44\ V$$

Using these values in eqn 7 we get:

$$e. [0.1677\ V - (-1.44\ V)] = \phi_{WS_2} - \phi_{MoS_2}$$

$$\text{Or} \quad e. (1.6077\ V) = \phi_{WS_2} - \phi_{MoS_2}$$

$$\text{Or} \quad \Delta EF = \phi_{WS_2} - \phi_{MoS_2} = 1.6\ eV$$

This calculation suggests that work function of single layer WS<sub>2</sub> is more than multilayer-MoS<sub>2</sub>. This supports the validity of band structure shown in figure 8c. The values of ΔE<sub>F</sub> can vary based on layer numbers of MoS<sub>2</sub> as well as WS<sub>2</sub>.

## References:



- (1) Choi, S. H.; Shaolin, Z.; Yang, W. Layer-Number-Dependent Work Function of MoS<sub>2</sub> Nanoflakes. *J. Korean Phys. Soc.* **2014**, *64* (10), 1550–1555.  
<https://doi.org/10.3938/jkps.64.1550>.
- (2) Strategy, T. L. E.; Chen, K.; Wan, X.; Wen, J.; Xie, W.; Kang, Z.; Zeng, X.; Al, C. E. T. Electronic Properties of MoS<sub>2</sub>-WS<sub>2</sub> Heterostructures Synthesized with Two-Step Lateral Epitaxial Strategy. *ACS Nano* **2015**, *9* (10), 9868–9876.  
<https://doi.org/10.1021/acsnano.5b03188>.
